# Supplementary material
Source: Springer Nature journal article supplement (https://www.springermedizin.de/resource/supplementary/12939_2013_405_MOESM2_ESM.pdf/9551094)

**(a) Mortality**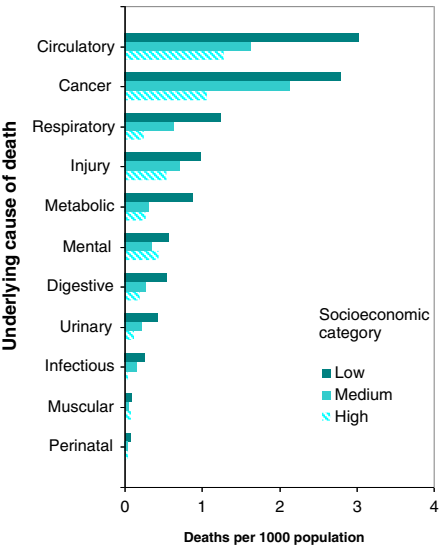**(b) Morbidity**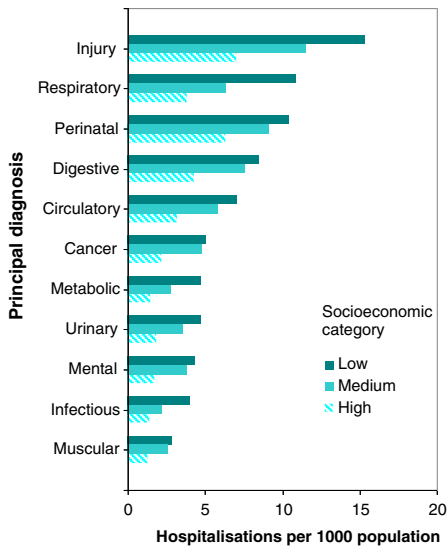

Supplement: MOESM2 [file 9551094]
